# Supplementary material for: Reference Gene Selection for Expression Analyses by qRT-PCR in Dendroctonus valens
Source: PubMed Central journal article supplement (PMC7349367; doi:10.3390/insects11060328), 2020-05-27
Supplement: insects-11-00328-s001.pdf [file insects-11-00328-s001.pdf]

|              | Min | Opt | Max |
|--------------|-----|-----|-----|
| Primer Size  | 18  | 20  | 22  |
| Primer Tm    | 57  | 60  | 63  |
| Primer GC%   | 40  | 50  | 60  |
| Product Size | 150 | 200 | 250 |

Figure S1 The design strategy of Primer3Plus

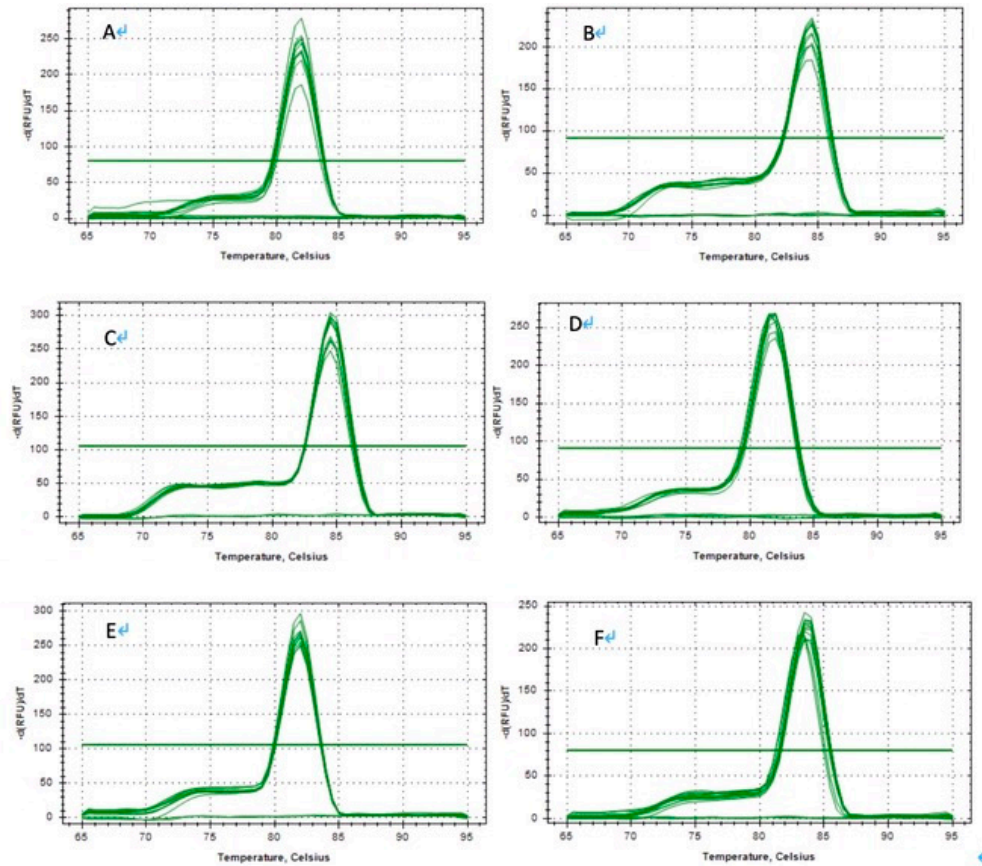

Figure S2 Specificity of real-time qRT-PCR amplification in *Dendroctonus valens*. Melting curves of six genes [*ACT* (A) , *SDHA* (B) , *18S rRNA* (C) , *RPS18* (D) , *CYP4G55* (E) and *TUB* (F) ] reveal single peaks.
